# Supplementary material for: Paper-based FRET for the direct detection of collagen triple helix
Source: Royal Society of Chemistry journal article supplement (doi:10.1039/c6tb01901c), 2016-01-01
Supplement: c6tb01901c1.pdf [file c6tb01901c1.pdf]

## Supporting Materials

### Paper-based FRET for direct detection of collagen triple helix

Xiangdong Cai, Qiuxia Yang, Jiamin Ding, Weiran Ye, Xuan Li, Jianxi Xiao

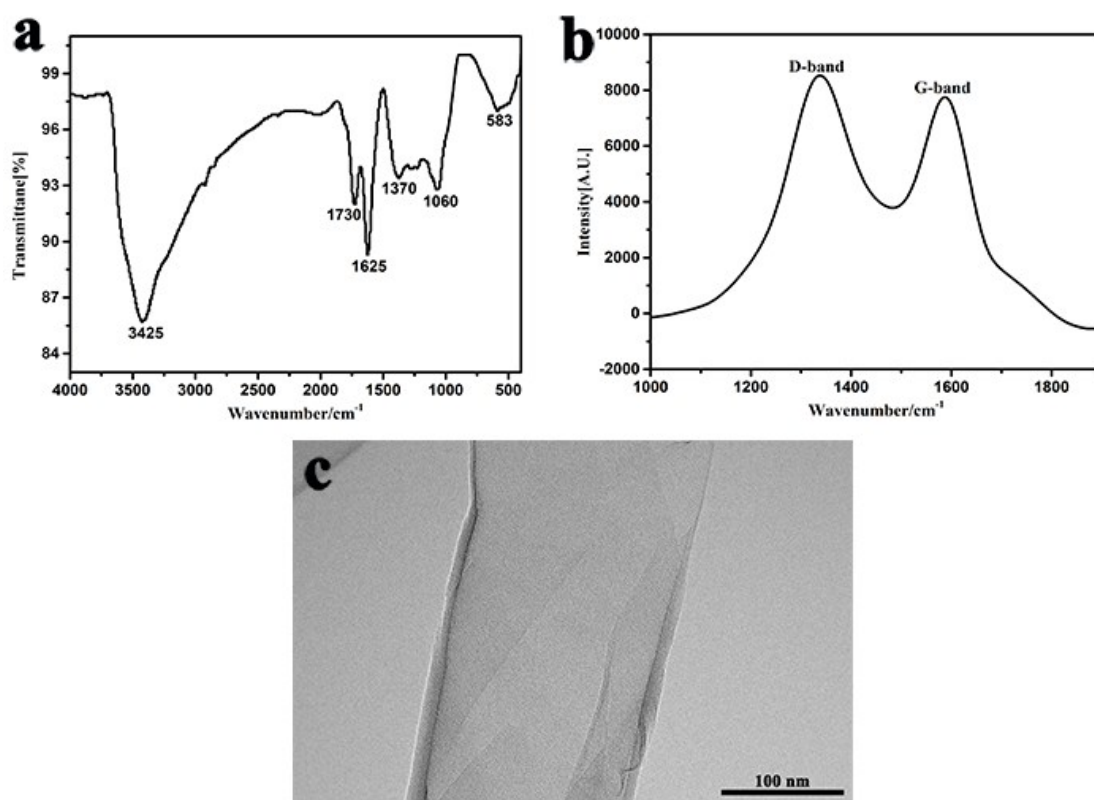

**Figure S1.** Characterization of GO: (a) FT-IR spectra of GO. (b) Raman spectra of GO. (c) TEM image of GO.

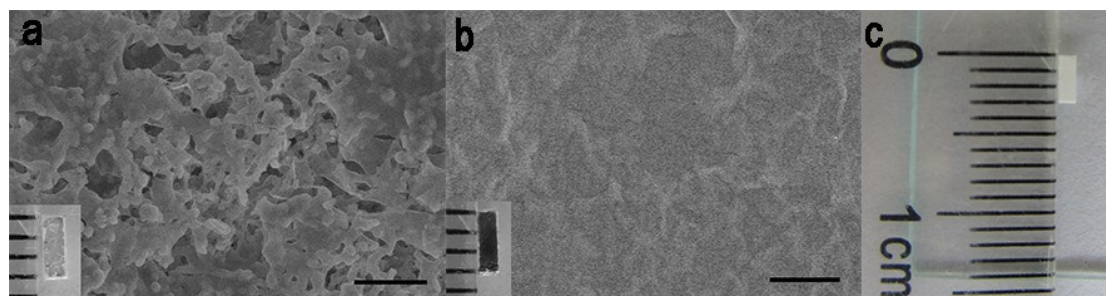

**Figure S2.** SEM images of the paper strips modified with different concentrations of GO: 1 mg/mL (a) and 10 mg/mL (b). Scale bar = 2.5 μm. The images of paper strips modified with different concentrations of GO (a: 1 mg/mL; b: 10 mg/mL; c: 0 mg/ml) were recorded by smartphones, and their sizes were measured by a ruler.
